# Supplementary material
Source: PubMed Central journal article supplement (PMC4520751)
Supplement: NIHMS688927-supplement-2.pdf [file NIHMS688927-supplement-2.pdf]

## **SUPPLEMENTARY NOTE**

### **Equipment and settings**

Figures 2e and 4a: mouse brains were imaged using a photometrics-cascade 1k camera mounted on an Olympus SZX10 microscope with an ACH1X objective. Images were processed using NIS-Elements AR 3.2 software.

Figure 3b: Immunohistochemical or hematoxylin and eosin stained tumor sections were imaged using a 40X objective on a Olympus DP71 microscope and images captured without manipulation using cellSens Olympus software.

Figure 6b: Cells were plated on the Labtek-Tek II chambered #1.5 German cover glass system in medium without antibiotics. After 24 hours, images were collected with a Zeiss LSM 780 NLO confocal microscope using a LDC-Apochromat 40xNA 1.1W objective or with a Nikon C2 confocal microscope using a plan fluor 40x NA 1.3 oil objective and all images were analyzed and quantified using Fiji software.

Figure 6c: Cells incubated with the fluorescein transferrin conjugate were imaged using a Nikon C2 confocal microscope with a plan fluor 40x1.3 NAO objective and images processed using NIS Elements software.
